# Supplementary material for: Impact of thermal gas treatment on the surface modification of Li-rich Mn-based cathode materials for Li-ion batteries
Source: Royal Society of Chemistry journal article supplement (doi:10.1039/d3ma00236e), 2023-01-01
Supplement: d3ma00236e1.pdf [file d3ma00236e1.pdf]

## Supporting Info

### Impact of Thermal Gas Treatment on the Surface Modification of Li-Rich Mn-based Cathode Materials for Li-ion Batteries

Received 00th January 20xx,  
Accepted 00th January 20xx

DOI: 10.1039/x0xx00000x

Maximilian Mellin,<sup>a</sup> Zhili Liang,<sup>a</sup> Hadar Sclar,<sup>b</sup> Sandipan Maiti,<sup>b</sup> Igor Piš,<sup>c</sup> Silvia Nappini,<sup>c</sup> Elena Magnano,<sup>c,d</sup> Federica Bondino,<sup>c</sup> Ilargi Napal,<sup>c,e</sup> Robert Winkler,<sup>a</sup> Réne Hausbrand,<sup>a</sup> Jan P. Hofmann,<sup>a</sup> Lambert Alff,<sup>a</sup> Boris Markovskiy,<sup>b</sup> Doron Aurbach,<sup>b</sup> Wolfram Jaegermann,<sup>a</sup> and Gennady Cherkashinin.<sup>a,\*</sup>

**Table S1** Theoretical parameters used for the Mn L<sub>3,2</sub>, Co L<sub>3,2</sub> and Ni L<sub>3,2</sub> edges simulations using CTM4XAS software.

|                            | Symmetry        | 10Dq (eV) | F <sub>d-d</sub> (%) | F <sub>p-d</sub> (%) | G <sub>p-d</sub> (%) | Dt (eV) | Ds (eV) | Δ (eV) | U <sub>d-d</sub> (eV) | U <sub>p-d</sub> (eV) |
|----------------------------|-----------------|-----------|----------------------|----------------------|----------------------|---------|---------|--------|-----------------------|-----------------------|
| <b>Mn</b>                  |                 |           |                      |                      |                      |         |         |        |                       |                       |
| Mn <sup>2+</sup><br>ref.75 | O <sub>h</sub>  | 1.2       | 80                   | 80                   | 80                   | -       | -       | 7      | 0                     | 0                     |
| Mn <sup>3+</sup><br>ref.75 | D <sub>4h</sub> | 1.54      | 65                   | 75                   | 75                   | 0.02    | 0.06    | 4      | 0                     | 0                     |
| Mn <sup>4+</sup><br>ref.76 | O <sub>h</sub>  | 2.5       | 70                   | 70                   | 70                   | -       | -       | 2.5    | 6.5                   | 8.5                   |
| <b>Co</b>                  |                 |           |                      |                      |                      |         |         |        |                       |                       |
| Co <sup>2+</sup><br>ref.77 | D <sub>4h</sub> | -0.75     | 90                   | 90                   | 90                   | 0       | 0.04    | -      | -                     | -                     |
| Co <sup>3+</sup><br>ref.77 | O <sub>h</sub>  | 1.8       | 70                   | 70                   | 70                   | -       | -       | -      | -                     | -                     |
| <b>Ni</b>                  |                 |           |                      |                      |                      |         |         |        |                       |                       |
| Ni <sup>2+</sup><br>ref.78 | O <sub>h</sub>  | 1.2       | 80                   | 80                   | 80                   | -       | -       | 3      | 0                     | 0                     |

Here, G<sub>p-d</sub> is the reduction factor (%) of the exchange Coulomb, F<sub>p-d</sub> and F<sub>d-d</sub> are direct Coulomb Slater integrals. The Δ is the charge transfer parameter. The Dt, Ds and 10Dq are the crystal field parameters. U<sub>d-d</sub> and U<sub>p-d</sub> parameters correspond to 3d-3d and 2p-3d intra-atomic Coulomb interactions.

<sup>a</sup> Department of Materials and Earth Sciences, Technical University of Darmstadt, 64287 Darmstadt, Germany.

<sup>b</sup> Department of Chemistry, Bar-Ilan University, Ramat-Gan 5290002, Israel.

<sup>c</sup> IOM-CNR Istituto Officina dei Materiali, Strada Statale 14, km 163,5 in Area Science Park, 34149 Basovizza, Trieste, Italy.

<sup>d</sup> Department of Physics, University of Johannesburg, PO Box 524, Auckland Park, 2006, Johannesburg, South Africa.

<sup>e</sup> Università degli Studi di Trieste, Physics Department, P.le Europa 1, 34127 Trieste, Italy.

\*Corresponding author: [gennady.cherkashinin@tu-darmstadt.de](mailto:gennady.cherkashinin@tu-darmstadt.de)

Electronic Supplementary Information (ESI) available: [details of any supplementary information available should be included here]. See DOI: 10.1039/x0xx00000x

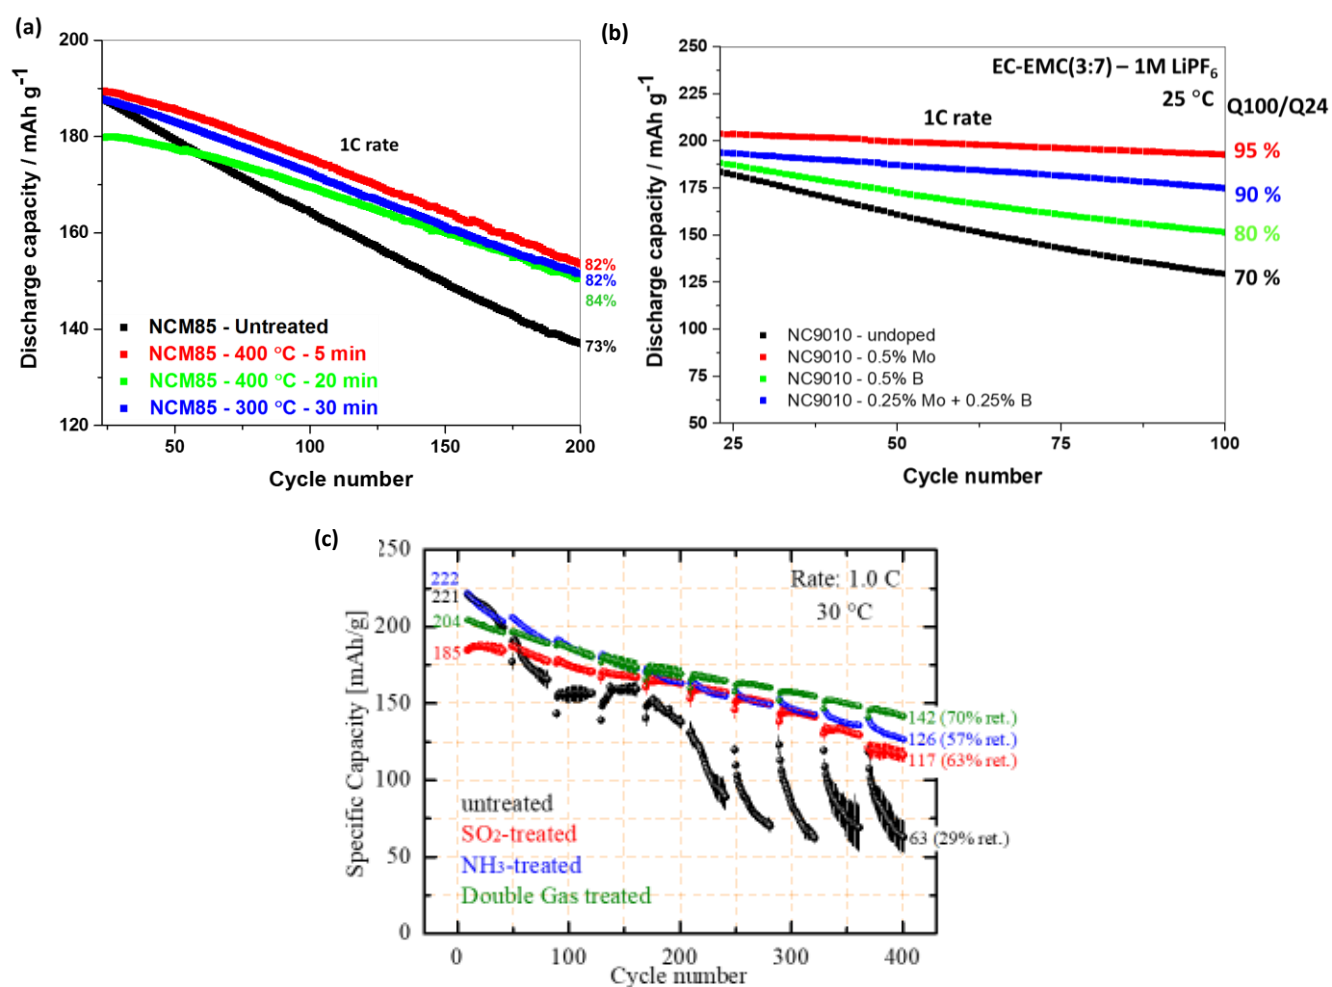

**Figure S1.** Cycling behaviour of electrodes comprising various materials: (a) LiNi<sub>0.85</sub>Co<sub>0.15</sub>Mn<sub>0.05</sub>O<sub>2</sub> (NCM85) untreated and SO<sub>2</sub>-gas treated for 5, 20 and 30 min, as indicated, ref. <sup>S1</sup>, (b) LiNi<sub>0.9</sub>Co<sub>0.1</sub>O<sub>2</sub> (NC9010) undoped, Mo-doped, B-doped and Mo-B-doped samples, ref. <sup>S2</sup>, (c) HE-NCM untreated, SO<sub>2</sub>-treated, NH<sub>3</sub>-treated, and double-gas treated, ref. <sup>S3</sup>.

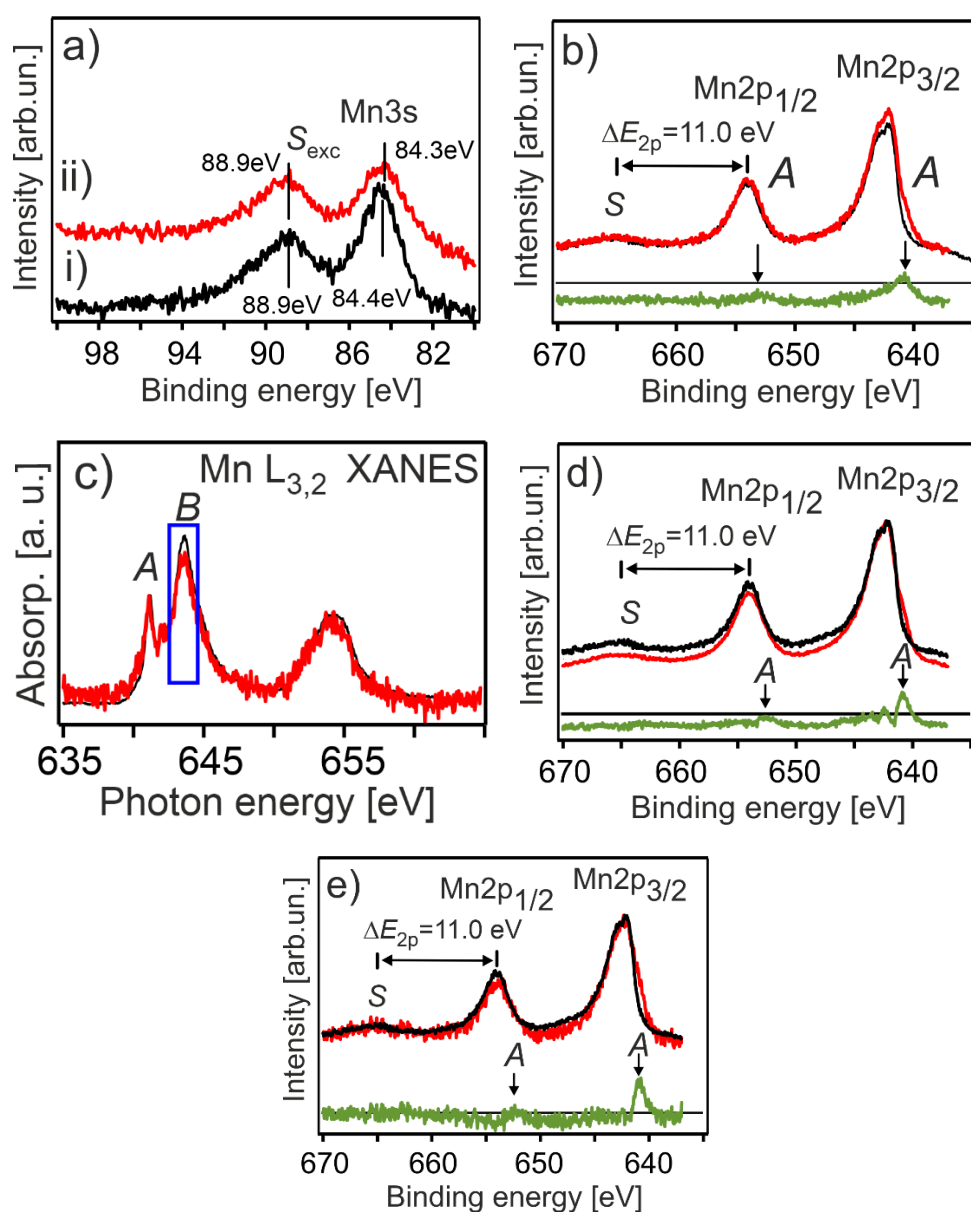

**Figure S2.** a) The Mn 3s photoelectron spectra of the *untreated HE-NCM: pristine* (without carbon and PVDF) (i) and *composite cathode* (with carbon and PVDF) (ii). The vertical lines show the binding energies of the main Mn 3s photoelectron peak and the exchange satellite,  $S_{exc}$ . The difference between Mn 3s and  $S_{exc}$  for the *pristine* and the *composite cathode* is  $\Delta E_s \sim 4.5$  eV and 4.6 eV, respectively. b) Mn 2p photoelectron spectra of the *untreated HE-NCM: pristine* (black line) and *composite cathode* (red line). c) Mn L edge of the *untreated HE-NCM: pristine* (black line) and *composite cathode* (red line) measured in the partial electron yield mode (PEY). The B/A ratio is lower for the *HE-NCM composite*, which is a sign of a partial reduction of  $Mn^{4+}$  ions. d) Mn 2p photoelectron spectra of the *untreated HE-NCM pristine* (black line) and *treated HE-NCM without carbon and PVDF* (red line). e) Mn 2p photoelectron spectra of the *untreated HE-NCM pristine* (black line) and the *treated HE-NCM composite cathode* (red line). The difference photoelectron spectra are shown in green with the vertical arrows pointing the spectral feature A different from  $Mn^{4+}$  state. All the spectra are normalized to their maximal intensity.

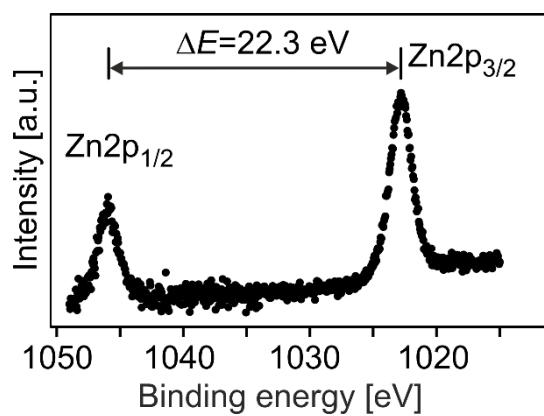

**Figure S3.** The Zn 2p photoemission of the HE-NCM double-gas (SO<sub>2</sub> and NH<sub>3</sub>) treated composite cathode. The Zn 2p<sub>3/2</sub> spectrum at  $E_{\text{bin}} \sim 1022.8$  eV evidences traces of ZnSO<sub>4</sub> (or ZnCO<sub>3</sub>) at the surface of the HE-NCM.

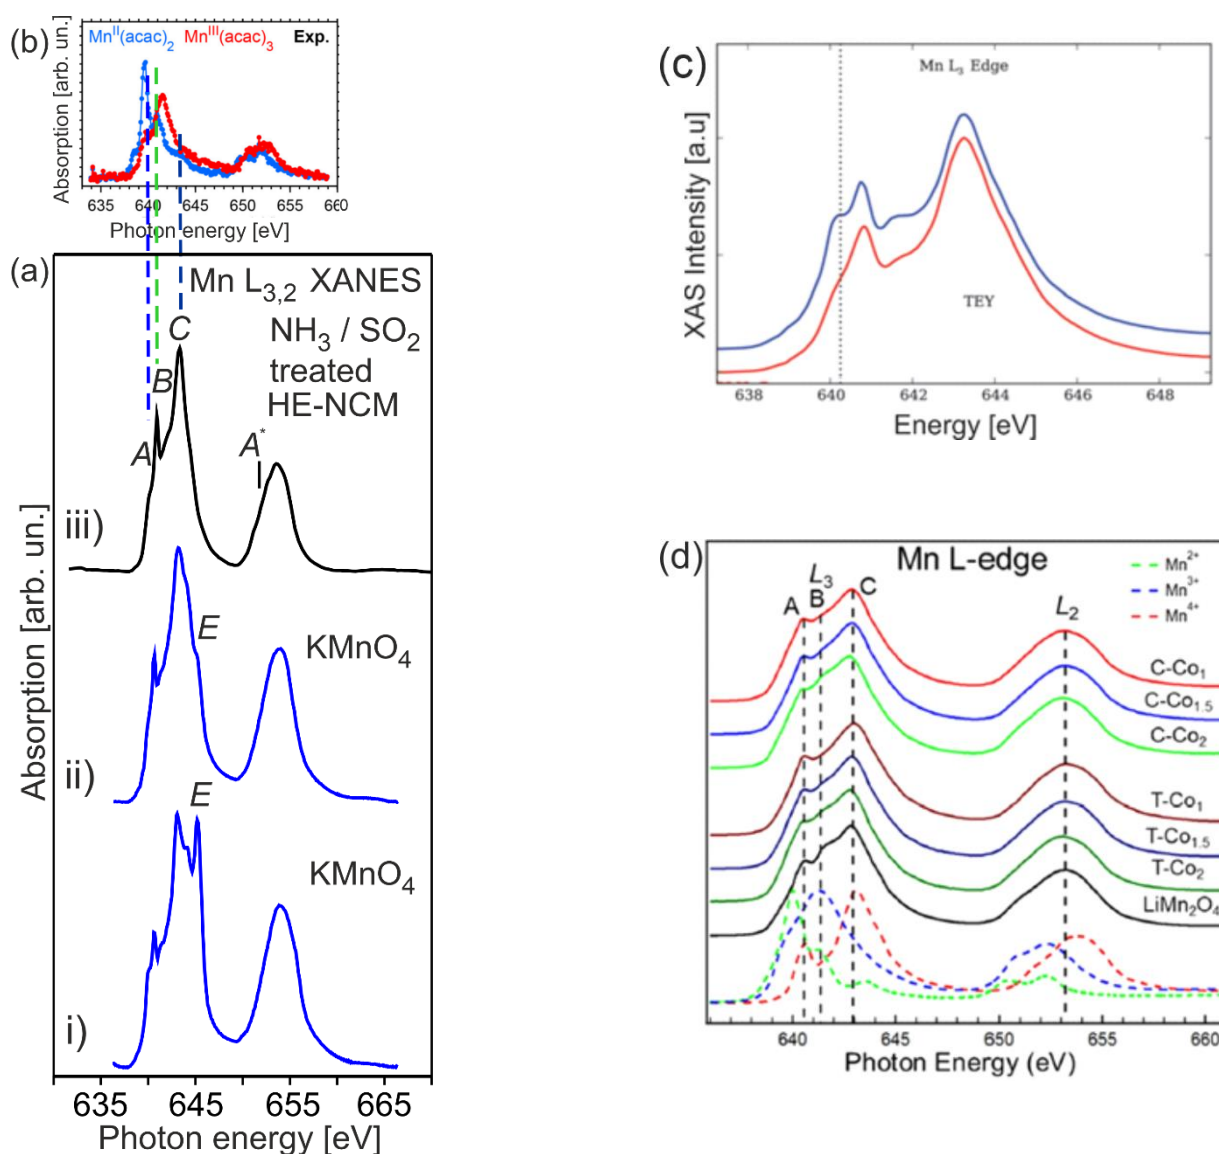

**Figure S4.** (a) Mn  $L_{3,2}$  XANES of  $\text{KMnO}_4$  (i, ii) and HE-NCM double-gas  $\text{NH}_3$  and  $\text{SO}_2$  treated composite cathode material (iii). The  $E$  spectral feature (i, ii) is characteristic for  $\text{Mn}^{7+}$  and it is strongly decreased in intensity as soon as  $\text{Mn}^{7+}$  state is photon reduced (ii). (b)  $\text{Mn}^{\text{II}}(\text{acac})_2$  and  $\text{Mn}^{\text{III}}(\text{acac})_3$  complexes in solution (Ref.<sup>S4</sup>). (c) Mn  $L_3$  edge of NMC442 (blue) and NMC442- $\text{TiO}_2$  (red) after electrochemical cycling: dotted vertical line indicates the position of the +2 oxidation state (reproduced from Ref.<sup>S5</sup>). (d) Mn L edge of  $\text{MnO}$  ( $\text{Mn}^{2+}$ ),  $\text{Mn}_2\text{O}_3$  ( $\text{Mn}^{3+}$ ) and  $\text{Li}_2\text{MnO}_3$  ( $\text{Mn}^{4+}$ ) shown by colour dashed lines,  $\text{LiMn}_2\text{O}_4$  (black solid) and  $\text{Co}_x\text{Mn}_{3-x}\text{O}_4$  with  $x=1; 1.5; 2$ . C- $\text{Co}_x$  and T- $\text{Co}_x$  are cubic and tetragonal spinel, respectively (reproduced from Ref.<sup>S6</sup>).

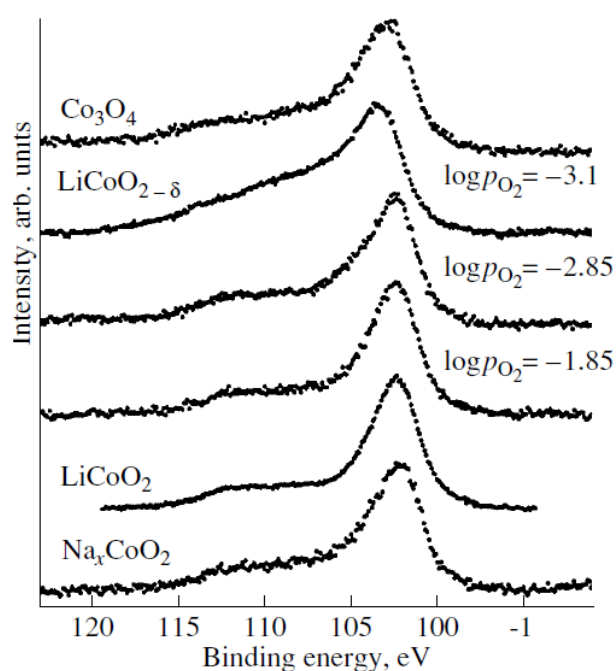

**Figure S5.** Co 3s photoemission and Co 2p X-ray emission spectrum (on the top) of various cobalt oxides adapted from Ref.<sup>57</sup>.

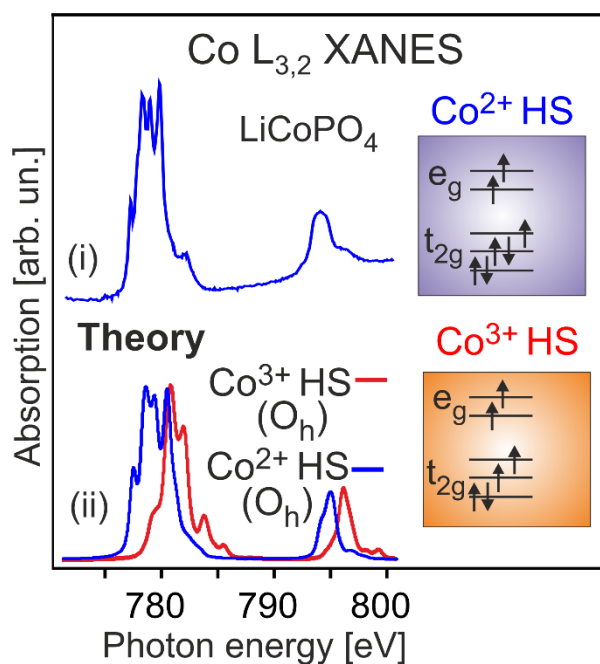

**Figure S6.** (a) Co  $L_{3,2}$  XANES of a  $\text{LiCoPO}_4$  thin-film cathode material (a, i). Theoretical calculations of the Co  $L_{3,2}$  edges for the  $\text{Co}^{2+}$  with HS spin in  $O_h$  coordination geometry with  $np^6 3d^6$  ground and  $np^5 3d^7$  final states (a, ii) (see for details Ref.<sup>58</sup>). The insert shows the electron configuration of  $\text{Co}^{2+}$  and  $\text{Co}^{3+}$  states in  $O_h$  symmetry.

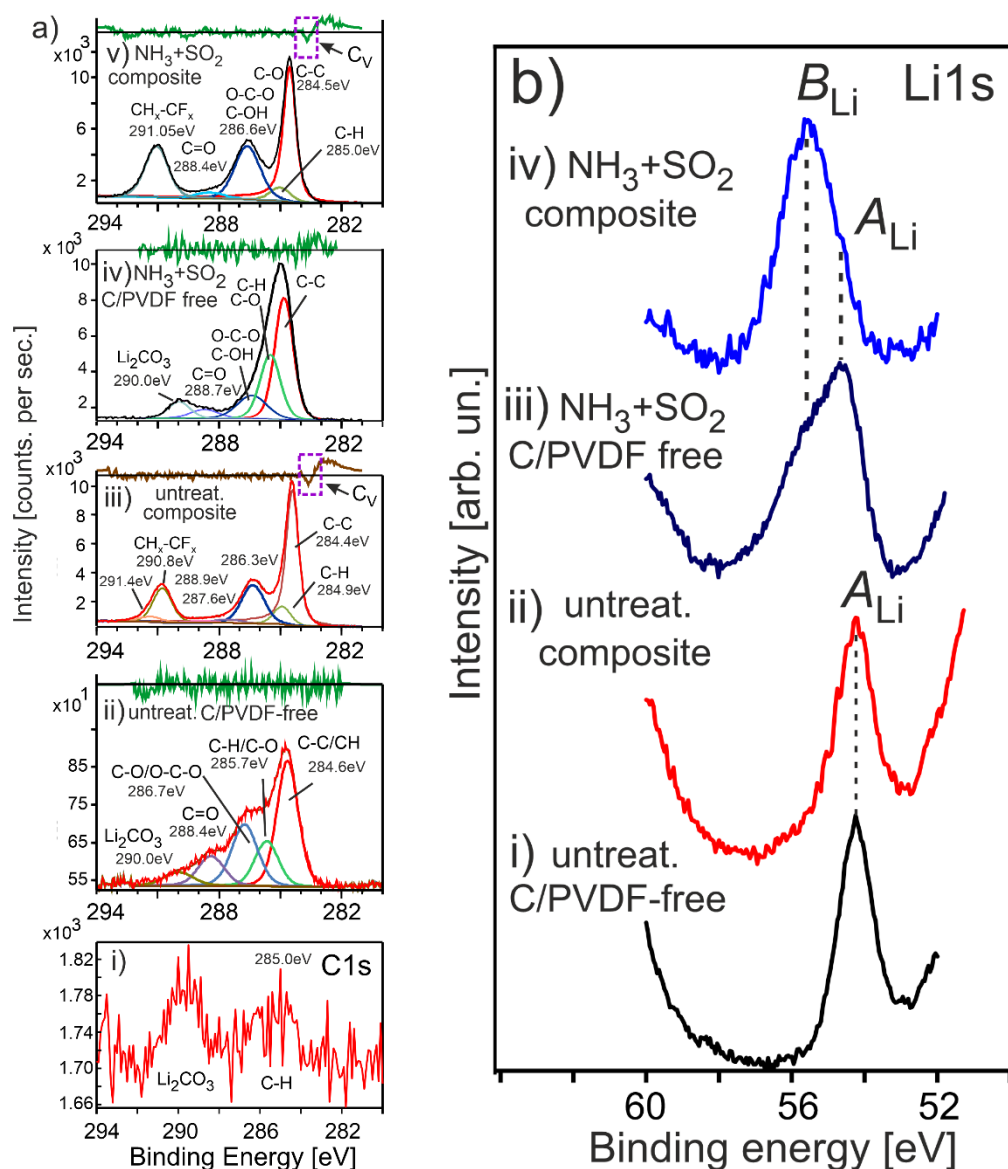

**Figure S7.** The C 1s (a) photoelectron spectra of (i) a  $\text{LiCoO}_2$  thin film, (ii- v) HE-NCM vs. the treatment: (ii) *pristine*, (iii) *untreated composite*, (iv) *treated*, (v) *treated composite*. The green curve above the C 1s photoemission is the difference between the mathematical model and the result of the fitting procedure. A defect state  $C_V$ , highlighted with the frame, at  $E_{\text{bin}} \sim 283.5$  eV appears after mixing the HE-NCM active material with conductive carbon and PVDF (ii, iv). The procedure of fitting component peaks to reproduce experimental photoemission spectra utilizes mathematical algorithms to minimize a figure-of-merit as a measure of the closeness of the mathematic model to the experimental data [see description of a common fitting procedure in Ref.<sup>59</sup>]. b) The normalized Li 1s photoelectron spectra of HE-NCM vs. the treatment: (i) *pristine*, (ii) *untreated composite*, (iii) *treated*, (iv) *treated composite*. The peak maxima and shoulder are labelled as  $A_{\text{Li}}$  ( $E_{\text{bin}} = 54.2$  eV (i, ii) and 54.7 eV (iii, iv)), and  $B_{\text{Li}}$  ( $E_{\text{bin}} = 55.6$  eV (iii, iv)).

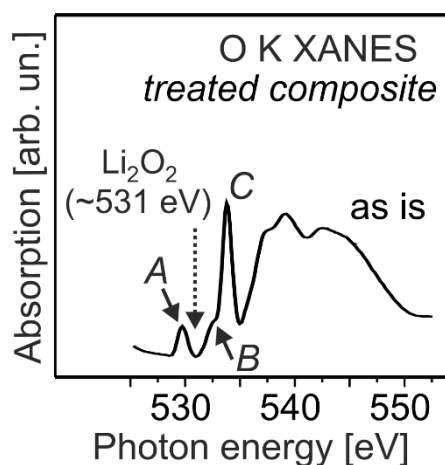

**Figure S8.** O K XANES of the as prepared *treated HE-NCM composite*.  $\text{Li}_2\text{O}_2$ , which is expected at  $\sim 531$  eV [Ref. <sup>S10</sup>], is not detected.

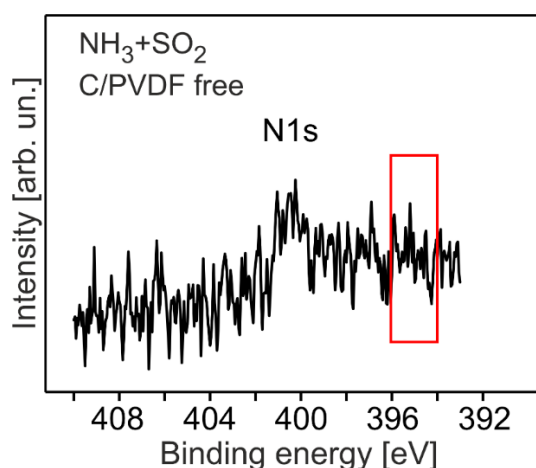

**Figure S9.** The N 1s photoelectron spectrum of the *treated HE-NCM*. The binding energy region of  $\text{Li}_3\text{N}$  is shown by the red rectangular.

## References

- S1 F. A. Susai, H. Sclar, S. Maiti, L. Burstein, O. Perkal, J. Grinblat, M. Talianker, S. Ruthstein, C. Erk, P. Hartmann, B. Markovsky and D. Aurbach, *ACS Appl. Energy Mater.*, 2020, **3**, 3609.
- S2 S. Maiti, H. Sclar, Rosy, J, Grinblat, M. Talianker, M. Tkachev, M. Tsubery, X. Wu, M. Noked, B. Markovsky and D. Aurbach, *Energy Storage Mater.*, 2022, **45**, 74.
- S3 F. A. Susai, A. Bano, S. Maiti, J. Grinblat, A. Chakraborty, H. Sclar, T. Kravchuk, A. Kondrakov, M. Tkachev, M. Talianker, D. T. Major, B. Markovsky and D. Aurbach, *J. Mater. Chem. A*, 2023, **11**, 12958.
- S4 M. Kubin, M. Guo, M. Ekimova, M. L. Baker, T. Kroll, E. Källman, J. Kern, V. K. Yachandra, J. Yano, E. T. J. Nibbering, M. Lundberg and P. Wernet, *Inorg. Chem.*, 2018, **57**, 5449.
- S5 S. Wolff- Goodrich, F Lin, I. M. Markus, D. Nordlund, H. L. Xin, M. Asta and M. M. Doeff, *Phys. Chem. Chem. Phys.*, 2015, **17**, 21778.



## Supporting Info

- S6 X. Long, P. Yu, N. Zhang, C. Li, X. Feng, G. Ren, S. Zheng, J. Fu, F. Cheng and X. Liu, *Nanomater.* 2019, **9**, 577.
- S7 V. R. Galakhov, V. V. Karelina, D. G. Kellerman, V. S. Gorshkov, N. A. Ovechkina and M. Neumann, *Phys. Solid State*, 2022, **44**(2), 266.
- S8 G. Cherkashinin, R. Eilhardt, S. Nappini, M. Cococcioni, I. Pís, S. dal Zilio, F. Bondino, N. Marzari, E. Magnano and L. Alff, *ACS Appl. Mater. Interfaces*, 2022, **14**, 543.
- S9 G. H. Major, N. Fairley, P. M. A. Sherwood, M. R. Linford, J. Terry, V. Fernandez and K. Artyushkova, *J. Vac. Sci. Technol. A*, 2020, **38**(6), 061203.
- S10 R. Qiao, Yi.- D. Chuang, S. Yan and W. Yang, *PLOS ONE*, 2012, **7**(11), e49182.
